# Supplementary material for: Plasma Vitamin C and Risk of Late Graft Failure in Kidney Transplant Recipients: Results of the TransplantLines Biobank and Cohort Study
Source: MDPI journal article supplement (doi:10.3390/antiox10050631), 2021-04-21
Supplement: s1 [file s1]

## **Plasma Vitamin C and Risk of Late Graft Failure in Kidney Transplant Recipients:**

### **Results of the TransplantLines Biobank and Cohort Study**

Camilo G. Sotomayor, MD, PhD<sup>1,2</sup>; Nicolás I. Bustos, BSc<sup>2</sup>; Manuela Yepes-Calderón, MD<sup>1</sup>;

Diego Arauna, PhD<sup>3</sup>; Martin H. de Borst, MD, PhD<sup>1</sup>; Stefan P. Berger, MD, PhD<sup>1</sup>;

Ramón Rodrigo, MSc<sup>2</sup>; Robin P.F. Dullaart, MD, PhD<sup>4</sup>; Gerjan J. Navis, MD, PhD<sup>1</sup>;

Stephan J.L. Bakker, MD, PhD<sup>1</sup>; TransplantLines Investigators

<sup>1</sup>Division of Nephrology, Department of Internal Medicine, University Medical Center Groningen, University of Groningen, Groningen, the Netherlands; <sup>2</sup>Faculty of Medicine, University of Chile, Santiago, Chile; <sup>3</sup>Department of Clinical Biochemistry and Immunohaematology, Faculty of Health Sciences, Universidad de Talca, Talca, Chile; <sup>4</sup>Department of Endocrinology, University of Groningen, Groningen, the Netherlands

**Correspondence:** Dr. Camilo G. Sotomayor. Division of Nephrology, Department of Internal Medicine, University Medical Center Groningen, Hanzeplein 1, P.O. Box 30.001, 9713 GZ Groningen, the Netherlands. Tel:31-050-361-1564. E-mail: c.g.sotomayor.campos@umcg.nl.

**Table S1.** Potential effect-modifiers of the association between plasma vitamin C and risk of graft failure

| Potential effect-modifiers             | Plasma vitamin C, per 1-SD increment |      |
|----------------------------------------|--------------------------------------|------|
|                                        | B                                    | P    |
| Age, years                             | 0.01                                 | 0.28 |
| Sex (male)                             | 0.35                                 | 0.24 |
| eGFR, mL/min/1.73 m <sup>2</sup>       | <0.001                               | 0.68 |
| Proteinuria ≥0.5 g/24 h                | −0.29                                | 0.29 |
| Systolic blood pressure, mmHg          | 0.002                                | 0.69 |
| Fruit consumption, servings/day        | 0.04                                 | 0.74 |
| Vegetable consumption, tablespoons/day | −0.04                                | 0.83 |
| hs-CRP, mg/L                           | 0.001                                | 0.98 |
| Triglycerides, mg/dL                   | 0.28                                 | 0.01 |
| HDL cholesterol, mg/dL                 | −1.11                                | 0.04 |
| LDL cholesterol, mg/dL                 | −0.16                                | 0.34 |
| Dialysis vintage                       | 0.65                                 | 0.11 |
| Time since transplantation, years      | 0.004                                | 0.86 |
| Use of calcineurin inhibitor           | −0.13                                | 0.20 |
| Cumulative prednisolone, grams         | 0.002                                | 0.82 |

Cox proportional-hazards regression analyses were performed with adjustment for age, sex, body mass index, donor age, donor sex, eGFR and proteinuria.

**Table S2.** Stratified prospective analyses of the association of plasma vitamin C with risk of graft failure, using clinically relevant cut-off points

| Models                                                  | Plasma vitamin C |                  |                  |                                 |          |
|---------------------------------------------------------|------------------|------------------|------------------|---------------------------------|----------|
|                                                         | Tertiles         |                  |                  | Per 1-SD,<br>relative increment |          |
|                                                         | Tertile 1        | Tertile 2        | Tertile 3        |                                 |          |
|                                                         | Ref.             | HR (95% CI)      | HR (95% CI)      | HR (95% CI)                     | <i>P</i> |
| <b>Triglycerides (<math>P_{\text{int}}=0.01</math>)</b> |                  |                  |                  |                                 |          |
| <1.7 mmol/L ( $n_e=29$ )                                | 1.00             | 0.58 (0.25–1.33) | 0.16 (0.04–0.61) | 0.49 (0.30–0.79)                | 0.003    |
| $\geq 1.7$ mmol/L ( $n_e=46$ )                          | 1.00             | 0.75 (0.37–1.53) | 1.04 (0.46–2.31) | 1.05 (0.73–1.51)                | 0.80     |
| <b>HDL (<math>P_{\text{int}}=0.04</math>)</b>           |                  |                  |                  |                                 |          |
| <1.1 mmol/L ( $n_e=52$ )                                | 1.00             | 0.82 (0.42–1.58) | 1.29 (0.60–2.80) | 1.08 (0.77–1.53)                | 0.65     |
| $\geq 1.1$ mmol/L ( $n_e=23$ )                          | 1.00             | 0.42 (0.17–1.01) | 0.08 (0.02–0.39) | 0.41 (0.25–0.68)                | 0.001    |

Cox proportional-hazards regression analyses were performed to assess the association of plasma vitamin C concentration with risk of graft failure ( $n_{\text{events}}=75$ ). Associations are shown with plasma vitamin C concentration as a continuous variable and according to tertiles of the vitamin C distribution (tertile 1,  $n=197$ : <35  $\mu\text{mol/L}$ ; tertile 2,  $n=202$ : 35–51  $\mu\text{mol/L}$ ; tertile 3,  $n=199$ :  $\geq 51$   $\mu\text{mol/L}$ ), with adjustment for age, sex, body mass index, donor age, donor sex, eGFR and proteinuria.
